# Supplementary material
Source: MDPI journal article supplement (https://www.mdpi.com/2079-6412/14/5/609)
Supplement: s1 [file s1 › coatings-3000368-supplementary.pdf]

# Optimized Functionalization of Graphene Oxide for Enhanced Mechanical Properties in Epoxy Resin Composites

Xin Li <sup>1</sup>, Bing Yu <sup>2</sup>, Jie Chen <sup>1</sup>, Dongxia Huo <sup>1</sup>, Jun Liu <sup>2,\*</sup> and Ding Nan <sup>1,2,\*</sup>

<sup>1</sup> *College of Chemistry and Chemical Engineering, Inner Mongolia University, Hohhot 010021, China*

<sup>2</sup> *Inner Mongolia Key Laboratory of Graphite and Graphene for Energy Storage and Coating, School of Materials Science and Engineering, Inner Mongolia University of Technology, Hohhot 010051, China*

\* Correspondence: clxylj@163.com (J.L.); nd@imu.edu.cn (D.N.)

## List

Figure S1. XRD spectra of GO and MGO samples.

Figure S2. FT-IR spectra of GO and MGO samples.

Figure S3. Raman spectra of GO and MGO samples.

Figure S4. Tensile properties of epoxy and its composites with different MGO: stress-strain curves (a), tensile strength (b), elongation at break (c), and elastic modulus (d).

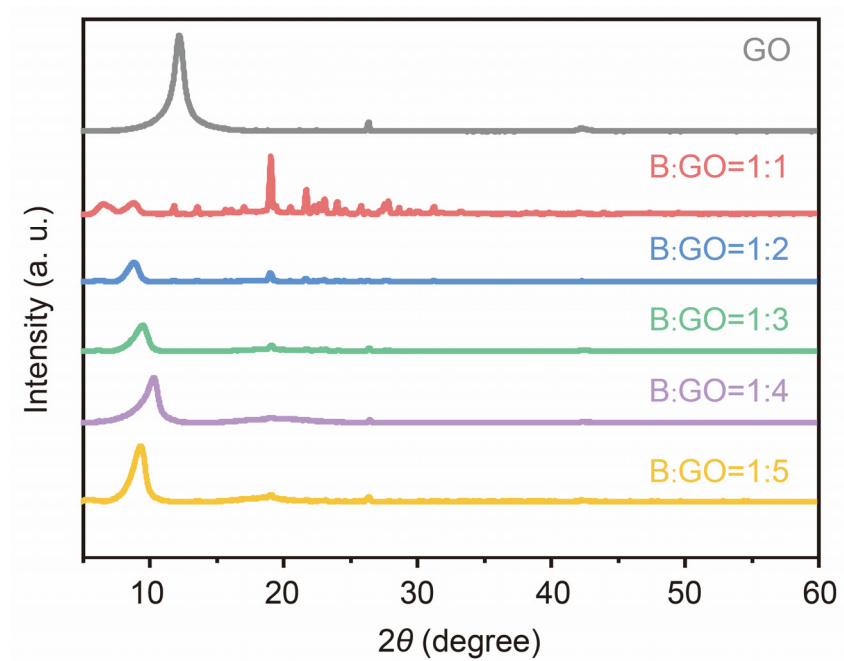

Figure S1. XRD spectra of GO and MGO samples.

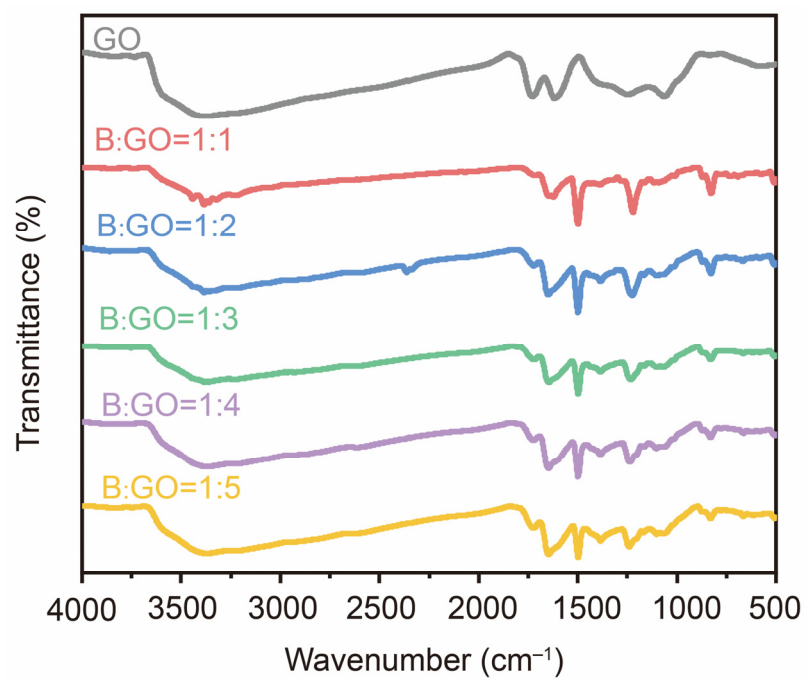

Figure S2. FT-IR spectra of GO and MGO samples.

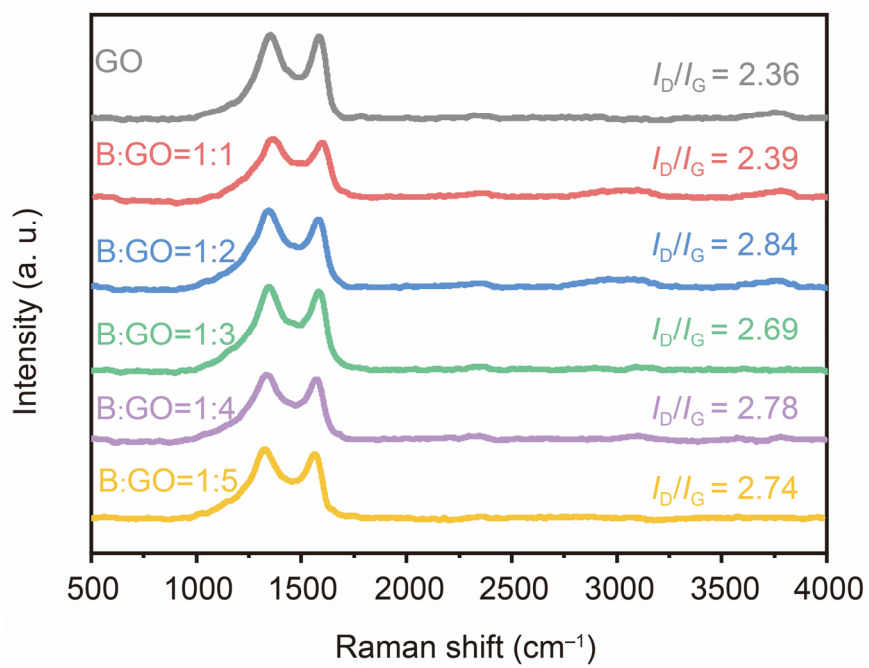

Figure S3. Raman spectra of GO and MGO samples.

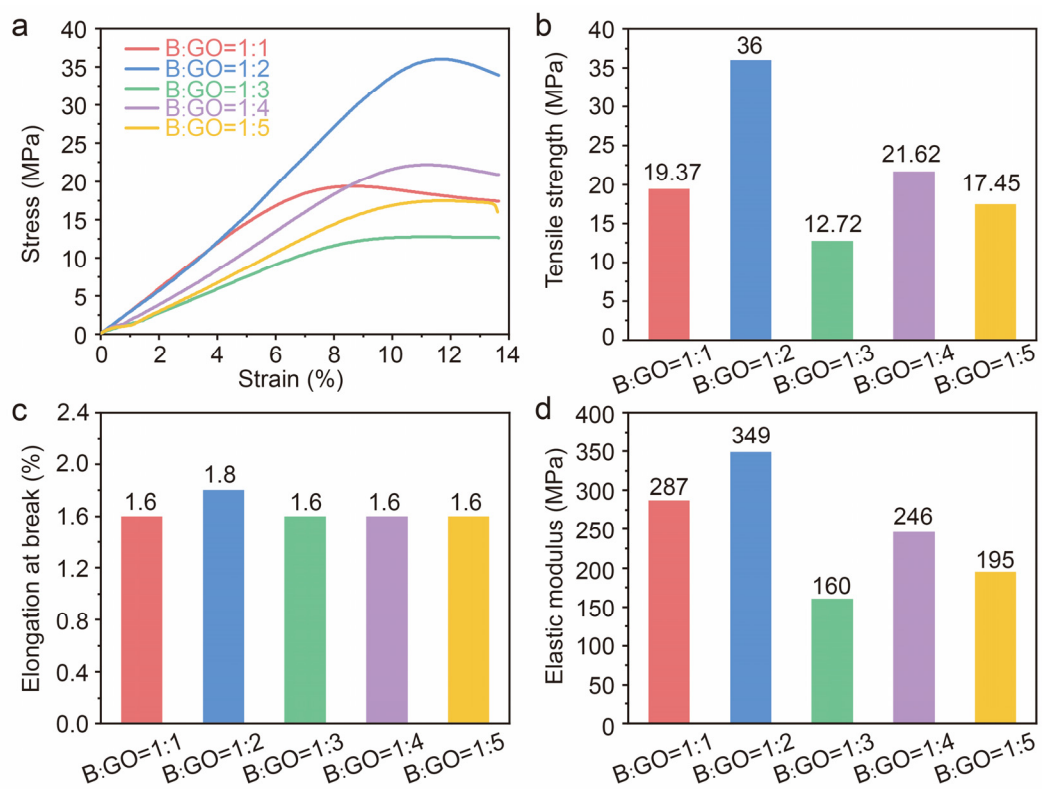

Figure S4. Tensile properties of epoxy and its composites with different MGO: stress-strain curves (a), tensile strength (b), elongation at break (c), and elastic modulus (d).
